# Supplementary material
Source: PubMed Central journal article supplement (PMC2827208)
Supplement: NIHMS168876-supplement-1_si_001.pdf [file NIHMS168876-supplement-1_si_001.pdf]

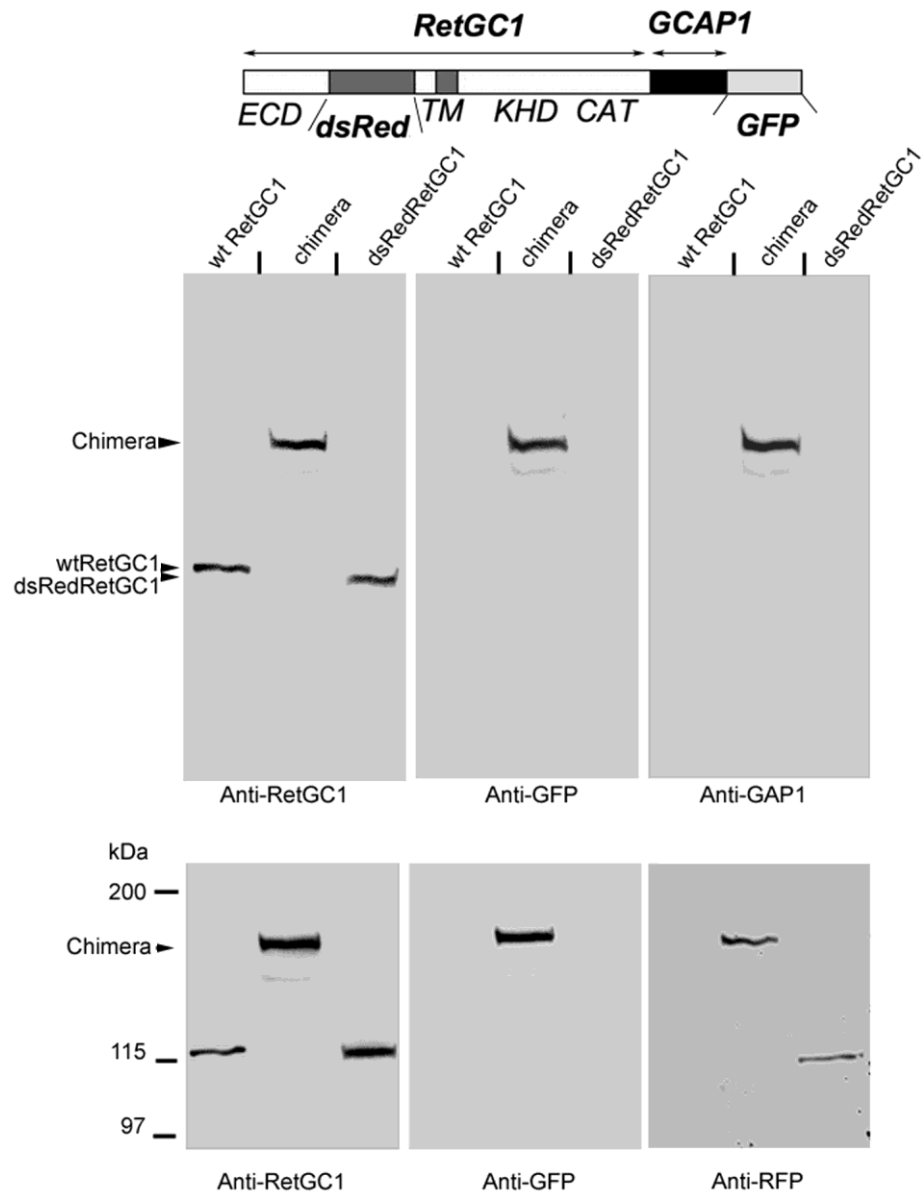

**Supplemental Figure 1S.** The schematics of the chimera construct and immunoblotting of the HEK293 membrane fraction isolated from cells expressing wild type RetGC1, dsRedRetGC1-GCAP1-GFP chimera or dsRedRetGC1 (as indicated above each lane) probed with RetGC1Cat, anti-GFP or anti-GCAP1 (32) antibody (*upper blots*) or with RetGC1Cat, anti-GFP and anti-dsRed RFP antibody (*lower blots*).
